# Supplementary material for: Evaluation of the bioequivalence and food effect on the bioavailability of CC-486 (oral azacitidine) tablets in adult patients with cancer
Source: Springer Nature journal article supplement (doi:10.1007/s00280-020-04037-9), 2020-02-08
Supplement: MOESM1 [file 17662192]

## SUPPLEMENTAL FILE

### **Evaluation of the Bioequivalence and Food Effect on the Bioavailability of CC-486 (Oral Azacitidine) Tablets in Adult Patients with Cancer**

Hani M. Babiker, MD; Mohammed Milhem, MBBS; Joseph Aisner, MD; William Edenfield, MD; Dale Shepard, MD, PhD; Michael Savona, MD; Swaminathan Iyer, MD, PhD; Maen Abdelrahim, MD, PhD; CL Beach, PharmD; Barry Skikne, MD; Eric Laille, MS; Kao-Tai Tsai, PhD; Thai Ho, MD, PhD

**Journal:** *Cancer Chemotherapy and Pharmacology*

**Corresponding author:** Hani M. Babiker, M.D.  
University of Arizona Comprehensive Cancer Center  
[hanibabiker@email.arizona.edu](mailto:hanibabiker@email.arizona.edu)

**Ethics Committees and Institutional Review Boards for the CC-486-CAGEN-001 Study**

| <b>Site No.</b> | <b>Investigator Name</b> | <b>Name/Address of IEC/IRB</b>                                                                                                                                                                                                                               | <b>Name of Chairperson(s)</b> |
|-----------------|--------------------------|--------------------------------------------------------------------------------------------------------------------------------------------------------------------------------------------------------------------------------------------------------------|-------------------------------|
| 001             | William Edenfield        | Greenville Health System<br>(GHS)<br>Institutional Review Board,<br>Committee C<br>701 Grove Road<br>Greenville, SC 29605                                                                                                                                    | James Hayes, MD               |
| 002             | Vivek Khemka             | Western Institutional Review<br>Board – WIRB<br>1019 39 <sup>th</sup> Avenue SE, Suite<br>120<br>Puyallup, WA 98374                                                                                                                                          | Erin Brower, MS, CIP          |
| 005             | Thai Ho                  | Mayo Clinic Institutional<br>Review Board<br>200 First Street SW<br>Rochester, MN 55905                                                                                                                                                                      | Ouellette Yves, MD            |
| 007             | Michael Savona           | Vanderbilt University<br>Institutional<br>Review Board<br>1313 21st Avenue South<br>504 Oxford House<br>Nashville, TN 37232-4315                                                                                                                             | James A.S. Muldowney,<br>MD   |
| 009             | Maen Abdelrahim          | The Methodist Hospital<br>Research<br>Institutional Review Board<br>1130 John Freeman<br>MS: MJG6-014<br>Houston, TX 77030<br>Former Address:<br>The Methodist Hospital<br>Research<br>Institutional Review Board<br>6565 Fannin Street<br>Houston, TX 77030 | Susan Miller, MD, MPH         |

**Supplementary Table 1. Baseline demographic and disease characteristics**

|                                                                                                                                                     | <b>Bioequivalence<br/>Cohort (Stage 1)<br/>(N = 30)</b> | <b>Food Effect<br/>Cohort (Stage 2)<br/>(N = 57)</b> |
|-----------------------------------------------------------------------------------------------------------------------------------------------------|---------------------------------------------------------|------------------------------------------------------|
| <b>Age, median (range)</b>                                                                                                                          | 68.5 (46, 86)                                           | 62.0 (31, 88)                                        |
| <b>Race, n (%)</b>                                                                                                                                  |                                                         |                                                      |
| White                                                                                                                                               | 27 (90)                                                 | 53 (93)                                              |
| Other <sup>a</sup>                                                                                                                                  | 2 (6)                                                   | 2 (4)                                                |
| Not Collected or Reported                                                                                                                           | 1 (3)                                                   | 2 (4)                                                |
| <b>Sex, n (%)</b>                                                                                                                                   |                                                         |                                                      |
| Male                                                                                                                                                | 20 (67)                                                 | 34 (60)                                              |
| Female                                                                                                                                              | 10 (33)                                                 | 23 (40)                                              |
| <b>BMI, median (range)</b>                                                                                                                          | 27.8 (16, 44)                                           | 26.6 (19, 47)                                        |
| <b>Malignancy type, n (%)</b>                                                                                                                       |                                                         |                                                      |
| Metastatic or inoperable solid tumors                                                                                                               | 27 (90)                                                 | 57 (100)                                             |
| Myelodysplastic syndromes                                                                                                                           | 1 (3)                                                   | 0                                                    |
| Acute myeloid leukemia                                                                                                                              | 1 (3)                                                   | 0                                                    |
| Multiple myeloma                                                                                                                                    | 1 (3)                                                   | 0                                                    |
| <b>Time since diagnosis (years), median (range)</b>                                                                                                 | 3.5 (0.1, 19.2)                                         | 4.8 (0.2, 27.1)                                      |
| <b>ECOG performance status score, n (%)</b>                                                                                                         |                                                         |                                                      |
| 0                                                                                                                                                   | 7 (23)                                                  | 20 (35)                                              |
| 1                                                                                                                                                   | 23 (77)                                                 | 34 (60)                                              |
| 2                                                                                                                                                   | 0                                                       | 3 (5)                                                |
| <sup>a</sup> Black or African-American, Asian, American Indian or Alaskan Native<br>BMI, body mass index; ECOG, Eastern Cooperative Oncology Group. |                                                         |                                                      |

**Supplementary Table 2. Plasma pharmacokinetic parameters for two formulations of CC-486 (2 x 150-mg tablets [Formulation A] and 1 x 300-mg tablet [Formulation B])**

| Treatment                                                                                                                                                                                                                                                                                                                                                                                                                                                                                                                                                                                                                                                    | Statistics     | AUC <sub>t</sub><br>(ng*h/mL) | AUC <sub>∞</sub><br>(ng*h/mL) | C <sub>max</sub><br>(ng/mL)  | T <sub>max</sub><br>(h)                    | t <sub>1/2</sub><br>(h) | CL/F<br>(L/h) | V <sub>z</sub> /F<br>(L) |
|--------------------------------------------------------------------------------------------------------------------------------------------------------------------------------------------------------------------------------------------------------------------------------------------------------------------------------------------------------------------------------------------------------------------------------------------------------------------------------------------------------------------------------------------------------------------------------------------------------------------------------------------------------------|----------------|-------------------------------|-------------------------------|------------------------------|--------------------------------------------|-------------------------|---------------|--------------------------|
| 2 x 150 mg tablets                                                                                                                                                                                                                                                                                                                                                                                                                                                                                                                                                                                                                                           | N              | 30                            | 30                            | 30                           | 30                                         | 30                      | 30            | 30                       |
|                                                                                                                                                                                                                                                                                                                                                                                                                                                                                                                                                                                                                                                              | Geometric Mean | 225.0                         | 228.5                         | 143.0                        | NA                                         | 0.544                   | 1313          | 1031                     |
|                                                                                                                                                                                                                                                                                                                                                                                                                                                                                                                                                                                                                                                              | Geometric %CV  | 63.7                          | 62.6                          | 53.1                         | NA                                         | 32.0                    | 62.6          | 67.4                     |
|                                                                                                                                                                                                                                                                                                                                                                                                                                                                                                                                                                                                                                                              | Median         | 226                           | 232                           | 149                          | 1.0                                        | 0.52                    | 1300          | 922                      |
|                                                                                                                                                                                                                                                                                                                                                                                                                                                                                                                                                                                                                                                              | Min, Max       | 71.8, 555                     | 76.4, 557                     | 34.5, 362                    | 0.48, 3.0                                  | 0.34, 1.1               | 538, 3930     | 389, 3860                |
| 1 x 300 mg tablet                                                                                                                                                                                                                                                                                                                                                                                                                                                                                                                                                                                                                                            | N              | 30                            | 30                            | 30                           | 30                                         | 30                      | 30            | 30                       |
|                                                                                                                                                                                                                                                                                                                                                                                                                                                                                                                                                                                                                                                              | Geometric Mean | 239.1                         | 241.6                         | 145.1                        | NA                                         | 0.492                   | 1242          | 881.1                    |
|                                                                                                                                                                                                                                                                                                                                                                                                                                                                                                                                                                                                                                                              | Geometric %CV  | 65.2                          | 64.5                          | 63.7                         | NA                                         | 26.9                    | 64.5          | 67.4                     |
|                                                                                                                                                                                                                                                                                                                                                                                                                                                                                                                                                                                                                                                              | Median         | 236                           | 237                           | 148                          | 1.0                                        | 0.46                    | 1270          | 900                      |
|                                                                                                                                                                                                                                                                                                                                                                                                                                                                                                                                                                                                                                                              | Min, Max       | 93.0, 640                     | 94.5, 642                     | 46.7, 362                    | 0.50, 2.5                                  | 0.33, 0.87              | 468, 3170     | 317, 2790                |
| PK Parameter                                                                                                                                                                                                                                                                                                                                                                                                                                                                                                                                                                                                                                                 | Treatment      | N                             | Geometric Mean                | Ratio (%) of Geometric Means | 90% CI of Ratio (%) of Geometric Means     | Intra-patient %CV       |               |                          |
| AUC <sub>t</sub> (ng*h/mL)                                                                                                                                                                                                                                                                                                                                                                                                                                                                                                                                                                                                                                   | 2 x 150 mg     | 30                            | 225.0                         | 106.27                       | (95.21, 118.62)                            | 25.4                    |               |                          |
|                                                                                                                                                                                                                                                                                                                                                                                                                                                                                                                                                                                                                                                              | 1 x 300 mg     | 30                            | 239.1                         |                              |                                            |                         |               |                          |
| AUC <sub>∞</sub> (ng*h/mL)                                                                                                                                                                                                                                                                                                                                                                                                                                                                                                                                                                                                                                   | 2 x150 mg      | 30                            | 228.5                         | 105.71                       | (95.01, 117.62)                            | 24.7                    |               |                          |
|                                                                                                                                                                                                                                                                                                                                                                                                                                                                                                                                                                                                                                                              | 1 x 300 mg     | 30                            | 241.6                         |                              |                                            |                         |               |                          |
| C <sub>max</sub> (ng/mL)                                                                                                                                                                                                                                                                                                                                                                                                                                                                                                                                                                                                                                     | 2 x 150 mg     | 30                            | 143.0                         | 101.52                       | (89.87, 114.68)                            | 28.3                    |               |                          |
|                                                                                                                                                                                                                                                                                                                                                                                                                                                                                                                                                                                                                                                              | 1 x 300 mg     | 30                            | 145.1                         |                              |                                            |                         |               |                          |
| PK Parameter                                                                                                                                                                                                                                                                                                                                                                                                                                                                                                                                                                                                                                                 | Condition      | N                             | Median                        | Median Difference            | 90% CI of Median Difference (Fed – Fasted) | P-value                 |               |                          |
| T <sub>max</sub> (h)*                                                                                                                                                                                                                                                                                                                                                                                                                                                                                                                                                                                                                                        | Fasted         | 30                            | 1.0                           | -0.017                       | (-0.25, 0.03)                              | <0.710                  |               |                          |
|                                                                                                                                                                                                                                                                                                                                                                                                                                                                                                                                                                                                                                                              | Fed            | 30                            | 1.0                           |                              |                                            |                         |               |                          |
| <p>N patients = the total number of patients for which the PK parameter could be calculated<br/>                     *Median and median difference (Test vs. Reference), and 90% CI of the median difference, are from Hodges-Lehmann estimate. The P value is from Wilcoxon signed-rank test.<br/>                     AUC<sub>∞</sub>, area under the plasma concentration-time curve from time 0 extrapolated to infinity; C<sub>max</sub>, maximum plasma concentration; T<sub>max</sub>, time to C<sub>max</sub>; t<sub>1/2</sub>, terminal half-life; CL/F, apparent total clearance; V<sub>z</sub>/F, volume of distribution; NA, not applicable.</p> |                |                               |                               |                              |                                            |                         |               |                          |
